# Supplementary material
Source: publisher site journal article supplement (https://www.dovepress.com/article/276239)

consensus matrix legend

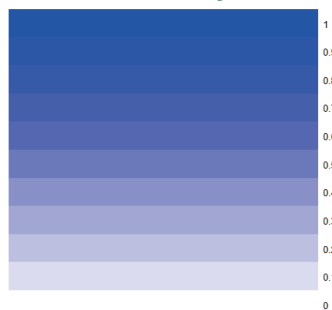

consensus matrix k=3

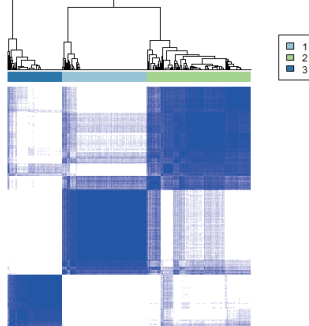

consensus matrix k=4

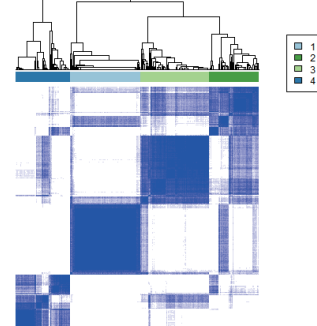

consensus matrix k=5

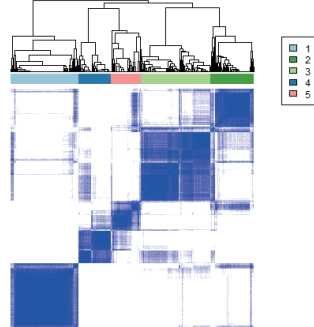

consensus matrix k=6

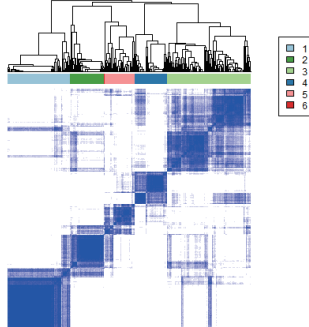

consensus matrix k=7

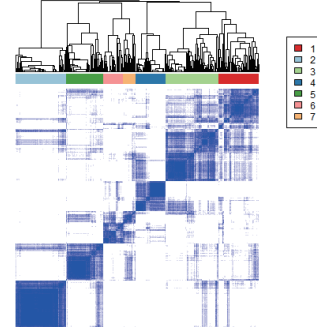

consensus matrix k=8

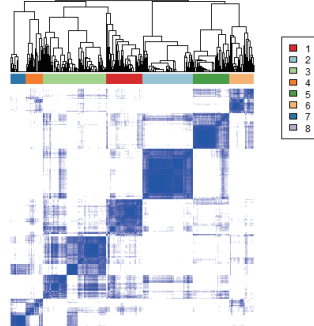

consensus matrix k=9

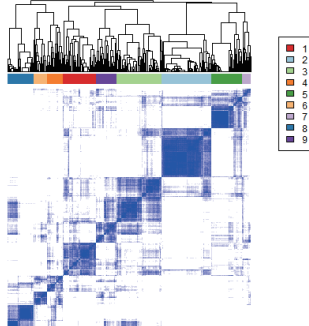

consensus CDF

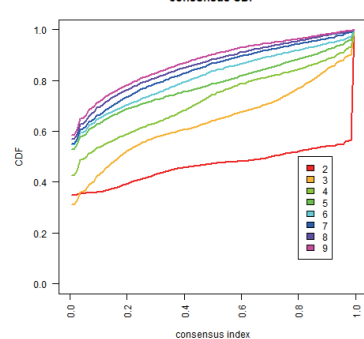

Supplement: Supplementary file 1 [file get_supplementary_file.php]
